# Supplementary material for: Computational assessment of the primary and secondary antioxidant potential of alkylresorcinols in physiological media
Source: Royal Society of Chemistry journal article supplement (doi:10.1039/d3ra05967g), 2023-01-01
Supplement: d3ra05967g1.pdf [file d3ra05967g1.pdf]

## Computational Assessment of the Primary and Secondary Antioxidant

### Potential of Alkylresorcinols in Physiological Media

Housseem Boulebd<sup>1,\*</sup> & Maciej Spiegel<sup>2</sup>

<sup>1</sup>Department of Chemistry, Faculty of Exact Science, University of Constantine 1, Constantine, 25000, Algeria

<sup>2</sup>Department of Pharmacognosy and Herbal Medicines, Faculty of Pharmacy, Wrocław Medical University, Borowska 211A, 50-556 Wrocław, Poland

\*Corresponding authors: [boulebd.housseem@umc.edu.dz](mailto:boulebd.housseem@umc.edu.dz) (H.B.)

| Table of Contents                                                                                                                                                                                                                                                                  | Page   |
|------------------------------------------------------------------------------------------------------------------------------------------------------------------------------------------------------------------------------------------------------------------------------------|--------|
| <b>Table S1.</b> calculated BDE (in kcal/mol) and $\Delta G$ (in kcal/mol) of the reaction of Oli and OliA with HOO <sup>•</sup> and HO <sup>•</sup> radicals in the gas phase computed at M06-2X/6-311++G(d,p) level.                                                             | S2     |
| <b>Table S2.</b> $\Delta G^\ddagger$ (kcal/mol), $\kappa$ , $k$ (M <sup>-1</sup> s <sup>-1</sup> ), and $\Gamma$ (%) of the reaction of Oli and OliA with HO <sup>•</sup> radical <i>via</i> RAF mechanism under physiological conditions, computed at M06-2X/6-311++G(d,p) level. | S3     |
| <b>Figure S1.</b> Parameters obtained in the validation of docking protocols for Myeloperoxidase (MP), cytochrome P450 (CP450), lipoxygenase (LOX), and xanthine oxidase (XO) enzymes.                                                                                             | S4     |
| <b>Table S3.</b> The cartesian coordinates and energies of selected TSs of the reactions of Oli and OliA with HOO <sup>•</sup> and HO <sup>•</sup> radicals computed at M06-2X/6-311++G(d,p) level.                                                                                | S5-S12 |

**Table S1.** calculated BDE (in kcal/mol) and  $\Delta G$  (in kcal/mol) of the reaction of Oli and OliA with HOO<sup>•</sup> and HO<sup>•</sup> radicals in the gas phase computed at M06–2X/6-311++G(d,p) level.

| FHT      |      |      |                                      |      |                                     |       | RAF      |                                      |      |                                     |       |
|----------|------|------|--------------------------------------|------|-------------------------------------|-------|----------|--------------------------------------|------|-------------------------------------|-------|
| Position | BDE  |      | $\Delta G^\circ$ (HOO <sup>•</sup> ) |      | $\Delta G^\circ$ (HO <sup>•</sup> ) |       | Position | $\Delta G^\circ$ (HOO <sup>•</sup> ) |      | $\Delta G^\circ$ (HO <sup>•</sup> ) |       |
|          | Oli  | OliA | Oli                                  | OliA | Oli                                 | OliA  |          | Oli                                  | OliA | Oli                                 | OliA  |
| 1OH      | 86.1 | 96.5 | 2.5                                  | 10.6 | -28.9                               | -20.8 | C1       | 15.6                                 | 21.7 | -11.5                               | -6.5  |
| 3OH      | 86.1 | 91.2 | 2.5                                  | 7.2  | -28.9                               | -24.2 | C2       | 14.5                                 | 17.3 | -10.4                               | -10.6 |
| 7CH      | 83.7 | 85.3 | 1.3                                  | 1.1  | -30.1                               | -30.3 | C3       | 15.6                                 | 19.9 | -11.5                               | -6.5  |
|          |      |      |                                      |      |                                     |       | C4       | 12.2                                 | 14.9 | -10.6                               | -8.2  |
|          |      |      |                                      |      |                                     |       | C5       | 12.2                                 | 17.5 | -10.6                               | -11.3 |
|          |      |      |                                      |      |                                     |       | C6       | 18.6                                 | 22.7 | -8.3                                | -8.9  |

**Table S2.**  $\Delta G^\ddagger$  (kcal/mol),  $\kappa$ ,  $k$  ( $M^{-1}s^{-1}$ ), and  $\Gamma$  (%) of the reaction of Oli and OliA with HO $\cdot$  radical *via* RAF mechanism under physiological conditions, computed at M06-2X/6-311++G(d,p) level.

| Comp. | Sol. | Position | State | $\Delta G^\ddagger$ | $\kappa$ | $k_{app}$          | $f^a$              | $k_f^b$            | $\Gamma$           | $\Sigma k_{RAF}$   |                    |
|-------|------|----------|-------|---------------------|----------|--------------------|--------------------|--------------------|--------------------|--------------------|--------------------|
| Oli   | PE   | C1       | Oli   | 9.0                 | 1.1      | $2.00 \times 10^6$ | -                  | -                  | 3.4                | $5.81 \times 10^7$ |                    |
|       |      | C2       |       | 6.2                 | 0.2      | $2.80 \times 10^7$ |                    |                    | 48.2               |                    |                    |
|       |      | C3       |       | 9.0                 | 1.1      | $2.00 \times 10^6$ |                    |                    | 3.4                |                    |                    |
|       |      | C4       |       | 5.3                 | 0.0      | $1.30 \times 10^7$ |                    |                    | 22.4               |                    |                    |
|       |      | C5       |       | 10.6                | 1.2      | $1.20 \times 10^5$ |                    |                    | 0.2                |                    |                    |
|       |      | C6       |       | 5.3                 | 0.0      | $1.30 \times 10^7$ |                    |                    | 22.4               |                    |                    |
|       | W    | C1       |       | 6.1                 | 0.1      | $2.00 \times 10^7$ | 0.9968             | $1.99 \times 10^7$ | 46.0               | $4.48 \times 10^7$ |                    |
|       |      | C2       |       | 2.1                 | 0.0      | $1.60 \times 10^5$ |                    | $1.59 \times 10^5$ | 0.4                |                    |                    |
|       |      | C3       |       | 6.1                 | 0.1      | $2.00 \times 10^7$ |                    | $1.99 \times 10^7$ | 46.0               |                    |                    |
|       |      | C4       |       | 2.2                 | 0.0      | $1.20 \times 10^5$ |                    | $1.20 \times 10^5$ | 0.3                |                    |                    |
|       |      | C5       |       | 8.6                 | 1.1      | $3.10 \times 10^6$ |                    | $3.09 \times 10^6$ | 7.1                |                    |                    |
|       |      | C6       |       | 2.2                 | 0.0      | $1.20 \times 10^5$ |                    | $1.20 \times 10^5$ | 0.3                |                    |                    |
| OliA  | PE   | C1       | OliA  | 13.3                | 1.3      | $1.60 \times 10^3$ | -                  | -                  | 0.0                | $1.04 \times 10^8$ |                    |
|       |      | C2       |       | 6.7                 | 0.6      | $4.30 \times 10^7$ |                    |                    | 41.3               |                    |                    |
|       |      | C3       |       | 12.4                | 1.3      | $6.90 \times 10^3$ |                    |                    | 0.0                |                    |                    |
|       |      | C4       |       | 4.5                 | 0.0      | $4.10 \times 10^7$ |                    |                    | 39.4               |                    |                    |
|       |      | C5       |       | 11.2                | 1.2      | $4.40 \times 10^4$ |                    |                    | 0.0                |                    |                    |
|       |      | C6       |       | 7.5                 | 1.0      | $2.00 \times 10^7$ |                    |                    | 19.2               |                    |                    |
|       | W    | C1       |       | OliA $^-$           | 8.4      | 1.1                | $4.70 \times 10^6$ | 0.9977             | $4.69 \times 10^6$ | 28.4               | $1.65 \times 10^7$ |
|       |      | C2       |       |                     | 0.7      | 0.0                | $9.20 \times 10^5$ |                    | $9.18 \times 10^5$ | 5.6                |                    |
|       |      | C3       |       |                     | 8.2      | 1.1                | $7.20 \times 10^6$ |                    | $7.18 \times 10^6$ | 43.5               |                    |
|       |      | C4       |       |                     | 7.2      | 0.0                | $2.60 \times 10^4$ |                    | $2.59 \times 10^4$ | 0.2                |                    |
|       |      | C5       |       |                     | 8.6      | 1.1                | $3.60 \times 10^6$ |                    | $3.59 \times 10^6$ | 21.8               |                    |
|       |      | C6       |       |                     | 3.0      | 0.0                | $9.40 \times 10^4$ |                    | $9.38 \times 10^4$ | 0.6                |                    |

<sup>a</sup>Mole fraction; <sup>b</sup> $k_f = f \cdot k_{app}$

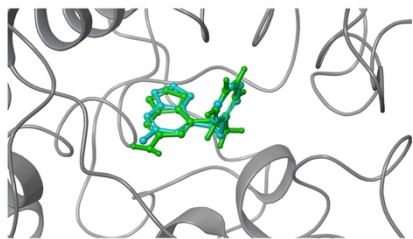

Enzyme : myeloperoxidase (MP, PDB: 5WDJ)  
Ligand : 7-(benzyloxy)-1H-[1,2,3]triazolo[4,5-d]pyrimidin-5-amine  
BA : -8.30 kcal/mol  
RMSD : 0.27 Å

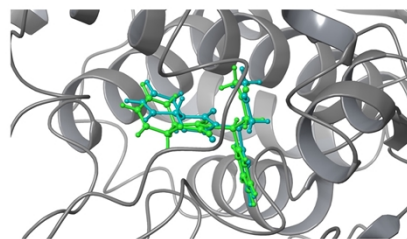

Enzyme : cytochrome P450 (CP450, PDB: 1OG5)  
Ligand : S-warfarin  
BA : -7.40 kcal/mol  
RMSD : 0.65 Å

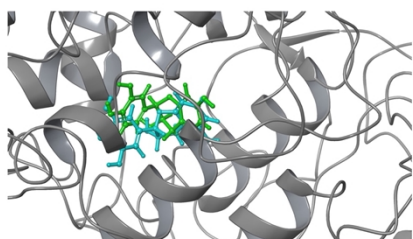

Enzyme : lipoxygenase (LOX, PDB: 1JNQ)  
Ligand : (-)-epigallocatechin gallate  
BA : -7.95 kcal/mol  
RMSD : 1.73 Å

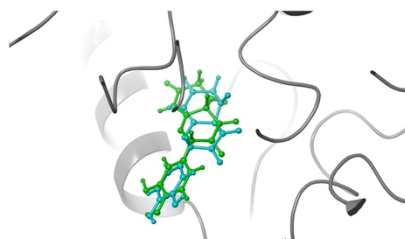

Enzyme : xanthine oxidase (XO, PDB: 3NVY)  
Ligand : quercetin  
BA : -6.12 kcal/mol  
RMSD : 1.73 Å

**Figure S1.** Parameters obtained in the validation of docking protocols for Myeloperoxidase (MP), cytochrome P450 (CP450), lipoxygenase (LOX), and xanthine oxidase (XO) enzymes.

**Table S3.** The cartesian coordinates and energies of selected TSs of the reactions of Oli and OliA with HOO• and HO• radicals computed at M06-2X/6-311++G(d,p) level.

| Oli-7C...H...OH (PE)  |             |             |                      |                                                   |
|-----------------------|-------------|-------------|----------------------|---------------------------------------------------|
| Cartesian Coordinates |             |             | Frequency and Energy |                                                   |
| C                     | 3.41680000  | 0.13370000  | -0.43750000          | Zero-point Energy Correction = 0.258664 Hartree   |
| C                     | 2.51750000  | 1.19850000  | -0.47150000          | Thermal Correction to Energy = 0.274598 Hartree   |
| C                     | 1.18460000  | 1.02030000  | -0.12180000          | Thermal Correction to Enthalpy = 0.275543 Hartree |
| C                     | 0.73820000  | -0.24370000 | 0.27870000           | Thermal Correction to Free Energy = 0.213338      |
| C                     | 1.62900000  | -1.31150000 | 0.32650000           | Hartree                                           |
| C                     | 2.96160000  | -1.11630000 | -0.03770000          | EE + Zero-point Energy = -654.6576 Hartree        |
| O                     | 3.78550000  | -2.19590000 | 0.02020000           | EE + Thermal Energy Correction = -654.64167       |
| O                     | 3.01300000  | 2.40380000  | -0.85830000          | Hartree                                           |
| C                     | -0.70090000 | -0.44360000 | 0.64950000           | EE + Thermal Enthalpy Correction = -654.64073     |
| C                     | -1.70370000 | -0.16800000 | -0.46580000          | Hartree                                           |
| C                     | -3.15050000 | -0.33670000 | -0.01150000          | EE + Thermal Free Energy Correction = -654.70293  |
| C                     | -4.15950000 | -0.12260000 | -1.13750000          | Hartree                                           |
| C                     | -5.60140000 | -0.27510000 | -0.66250000          |                                                   |
| H                     | 4.45270000  | 0.29690000  | -0.71540000          |                                                   |
| H                     | 0.50010000  | 1.86330000  | -0.14340000          |                                                   |
| H                     | 1.30430000  | -2.29670000 | 0.64020000           |                                                   |
| H                     | 4.67500000  | -1.94280000 | -0.25170000          |                                                   |
| H                     | 2.31210000  | 3.06500000  | -0.83110000          |                                                   |
| H                     | -0.85420000 | -1.43810000 | 1.07660000           |                                                   |
| H                     | -1.55500000 | 0.84460000  | -0.85520000          |                                                   |
| H                     | -1.49360000 | -0.85630000 | -1.29420000          |                                                   |
| H                     | -3.28590000 | -1.34050000 | 0.40980000           |                                                   |
| H                     | -3.35910000 | 0.37540000  | 0.79660000           |                                                   |
| H                     | -4.01530000 | 0.87570000  | -1.56500000          |                                                   |
| H                     | -3.95850000 | -0.83840000 | -1.94210000          |                                                   |
| H                     | -6.31180000 | -0.12260000 | -1.47830000          |                                                   |
| H                     | -5.77300000 | -1.27430000 | -0.25170000          |                                                   |
| H                     | -5.83180000 | 0.45140000  | 0.12220000           |                                                   |
| H                     | -0.92150000 | 0.29620000  | 1.49910000           |                                                   |
| O                     | -1.36870000 | 1.21310000  | 2.63690000           |                                                   |
| H                     | -2.11220000 | 0.66280000  | 2.93990000           |                                                   |
| Oli-7C...H...OH (W)   |             |             |                      |                                                   |
| Cartesian Coordinates |             |             | Frequency and Energy |                                                   |
| C                     | 3.41912600  | 0.37757000  | -0.25947300          | Zero-point Energy Correction = 0.257737 Hartree   |
| C                     | 2.48288700  | 1.29070700  | 0.22152800           | Thermal Correction to Energy = 0.273792 Hartree   |
| C                     | 1.15306000  | 0.93185900  | 0.40347900           | Thermal Correction to Enthalpy = 0.274736 Hartree |
| C                     | 0.74451900  | -0.37240200 | 0.10339200           | Thermal Correction to Free Energy = 0.211828      |
| C                     | 1.67131900  | -1.29862200 | -0.36990900          | Hartree                                           |

|                       |             |             |             |                                                  |
|-----------------------|-------------|-------------|-------------|--------------------------------------------------|
| C                     | 2.99902800  | -0.91335100 | -0.55141200 | EE + Zero-point Energy = -654.66323 Hartree      |
| O                     | 3.86895600  | -1.86062100 | -1.02449500 | EE + Thermal Energy Correction = -654.64717      |
| O                     | 2.94047600  | 2.55124900  | 0.50543700  | Hartree                                          |
| C                     | -0.68893200 | -0.76822500 | 0.29400900  | EE + Thermal Enthalpy Correction = -654.64623    |
| C                     | -1.69943600 | 0.05732300  | -0.49306900 | Hartree                                          |
| C                     | -3.14011500 | -0.36031900 | -0.21798100 | EE + Thermal Free Energy Correction = -654.70914 |
| C                     | -4.15396400 | 0.44308500  | -1.02806500 | Hartree                                          |
| C                     | -5.59263800 | 0.03599600  | -0.72533200 |                                                  |
| H                     | 4.45313300  | 0.67434500  | -0.39605200 |                                                  |
| H                     | 0.44799200  | 1.66213900  | 0.78877500  |                                                  |
| H                     | 1.37433700  | -2.31468700 | -0.60312400 |                                                  |
| H                     | 4.75672700  | -1.48645800 | -1.09032000 |                                                  |
| H                     | 2.21435500  | 3.09247900  | 0.84029900  |                                                  |
| H                     | -0.82450900 | -1.83697800 | 0.11006700  |                                                  |
| H                     | -1.57160300 | 1.11920200  | -0.25820100 |                                                  |
| H                     | -1.48047700 | -0.05851100 | -1.56203800 |                                                  |
| H                     | -3.25950800 | -1.42721400 | -0.44106000 |                                                  |
| H                     | -3.35429900 | -0.23735200 | 0.85092500  |                                                  |
| H                     | -4.01896500 | 1.50912100  | -0.81554500 |                                                  |
| H                     | -3.94808200 | 0.30838900  | -2.09541600 |                                                  |
| H                     | -6.30627100 | 0.61597300  | -1.31495200 |                                                  |
| H                     | -5.75288400 | -1.02228200 | -0.94965200 |                                                  |
| H                     | -5.82553300 | 0.19175300  | 0.33183700  |                                                  |
| H                     | -0.91883000 | -0.61966500 | 1.40383300  |                                                  |
| O                     | -1.27372100 | -0.20839600 | 2.86568200  |                                                  |
| H                     | -2.20575300 | -0.48514000 | 2.80984300  |                                                  |
| Oli-7C...H...OOH (P)  |             |             |             |                                                  |
| Cartesian Coordinates |             |             |             | Frequency and Energy                             |
| C                     | 3.57500500  | 0.40819700  | -0.21487800 | Zero-point Energy Correction = 0.262357 Hartree  |
| C                     | 2.57540400  | 1.36807700  | -0.06974800 | Thermal Correction to Energy = 0.278246 Hartree  |
| C                     | 1.23138200  | 1.01384200  | -0.08568800 | Thermal Correction to Enthalpy = 0.27919 Hartree |
| C                     | 0.87196000  | -0.33098900 | -0.25164600 | Thermal Correction to Free Energy = 0.217764     |
| C                     | 1.86954200  | -1.30038600 | -0.39166100 | Hartree                                          |
| C                     | 3.20892200  | -0.92449400 | -0.37440400 | EE + Zero-point Energy = -729.80102 Hartree      |
| O                     | 4.13447000  | -1.90840100 | -0.52135800 | EE + Thermal Energy Correction = -729.78513      |
| O                     | 2.98290400  | 2.65553500  | 0.08477400  | Hartree                                          |
| C                     | -0.54359500 | -0.75272200 | -0.24235700 | EE + Thermal Enthalpy Correction = -729.78418    |
| C                     | -1.61886800 | 0.22957200  | -0.64681900 | Hartree                                          |
| C                     | -3.01329400 | -0.39436200 | -0.63719000 | EE + Thermal Free Energy Correction = -729.84561 |
| C                     | -4.11938000 | 0.62737000  | -0.88853100 | Hartree                                          |
| C                     | -5.50815100 | -0.00361200 | -0.89395000 |                                                  |
| H                     | 4.61665500  | 0.71153700  | -0.20120000 |                                                  |
| H                     | 0.47458600  | 1.78144300  | 0.03516400  |                                                  |
| H                     | 1.61393500  | -2.34585800 | -0.51857200 |                                                  |
| H                     | 5.02077400  | -1.53043600 | -0.49494000 |                                                  |
| H                     | 2.21485300  | 3.22561900  | 0.20417200  |                                                  |
| H                     | -0.68669200 | -1.75138700 | -0.66237500 |                                                  |

|                       |             |             |             |                                                   |
|-----------------------|-------------|-------------|-------------|---------------------------------------------------|
| H                     | -1.60518400 | 1.09633100  | 0.02399300  |                                                   |
| H                     | -1.39410300 | 0.61683500  | -1.65004700 |                                                   |
| H                     | -3.06387300 | -1.18359300 | -1.39628600 |                                                   |
| H                     | -3.18745700 | -0.89279200 | 0.32581700  |                                                   |
| H                     | -4.06947800 | 1.40638600  | -0.11893600 |                                                   |
| H                     | -3.93688300 | 1.12680500  | -1.84644000 |                                                   |
| H                     | -6.28691600 | 0.74390000  | -1.06223000 |                                                   |
| H                     | -5.59179100 | -0.75758200 | -1.68174700 |                                                   |
| H                     | -5.71742600 | -0.49614800 | 0.06018000  |                                                   |
| H                     | -0.80106000 | -0.97219700 | 0.98766100  |                                                   |
| O                     | -1.20397400 | -1.03879600 | 2.19017100  |                                                   |
| O                     | -1.68111500 | 0.21899600  | 2.48136200  |                                                   |
| H                     | -2.63178200 | 0.15950400  | 2.29742400  |                                                   |
| Oli-7C...H...OOH (W)  |             |             |             |                                                   |
| Cartesian Coordinates |             |             |             | Frequency and Energy                              |
| C                     | 3.55144700  | 0.42209300  | -0.26401700 | Zero-point Energy Correction = 0.262795 Hartree   |
| C                     | 2.54414900  | 1.37467900  | -0.13755300 | Thermal Correction to Energy = 0.279264 Hartree   |
| C                     | 1.20169900  | 1.01375200  | -0.14513200 | Thermal Correction to Enthalpy = 0.280208 Hartree |
| C                     | 0.85182600  | -0.33541500 | -0.29034300 | Thermal Correction to Free Energy = 0.217232      |
| C                     | 1.85654200  | -1.30195400 | -0.41502500 | Hartree                                           |
| C                     | 3.19163900  | -0.91472300 | -0.40336900 | EE + Zero-point Energy = -729.80535 Hartree       |
| O                     | 4.13573900  | -1.89819700 | -0.53819000 | EE + Thermal Energy Correction = -729.78888       |
| O                     | 2.93998300  | 2.67981600  | -0.00770900 | Hartree                                           |
| C                     | -0.56195800 | -0.76674400 | -0.27100600 | EE + Thermal Enthalpy Correction = -729.78793     |
| C                     | -1.64483800 | 0.21696900  | -0.64821800 | Hartree                                           |
| C                     | -3.04142000 | -0.39530700 | -0.57703900 | EE + Thermal Free Energy Correction = -729.85091  |
| C                     | -4.14194600 | 0.62802400  | -0.84159700 | Hartree                                           |
| C                     | -5.53530600 | 0.01003900  | -0.78839700 |                                                   |
| H                     | 4.59338400  | 0.72303000  | -0.25922600 |                                                   |
| H                     | 0.44630300  | 1.78484300  | -0.04373500 |                                                   |
| H                     | 1.60417400  | -2.34995200 | -0.52939700 |                                                   |
| H                     | 5.01947100  | -1.50911600 | -0.53338300 |                                                   |
| H                     | 2.16280100  | 3.24782700  | 0.06936700  |                                                   |
| H                     | -0.70365100 | -1.76087700 | -0.70198800 |                                                   |
| H                     | -1.60283800 | 1.09361600  | 0.00817900  |                                                   |
| H                     | -1.45177200 | 0.58696600  | -1.66453400 |                                                   |
| H                     | -3.11840700 | -1.21490800 | -1.30082300 |                                                   |
| H                     | -3.19298600 | -0.83977600 | 0.41486300  |                                                   |
| H                     | -4.06404500 | 1.43128900  | -0.10051700 |                                                   |
| H                     | -3.97843300 | 1.08935900  | -1.82170600 |                                                   |
| H                     | -6.31280400 | 0.75755800  | -0.96174300 |                                                   |
| H                     | -5.64440700 | -0.77035300 | -1.54672400 |                                                   |
| H                     | -5.71964000 | -0.44631000 | 0.18839200  |                                                   |
| H                     | -0.79152300 | -1.00099000 | 0.94242400  |                                                   |
| O                     | -1.13927800 | -1.02456800 | 2.19153900  |                                                   |
| O                     | -1.49026700 | 0.27136400  | 2.48446800  |                                                   |
| H                     | -2.43712600 | 0.32666600  | 2.27449900  |                                                   |

| Oli-1O...H...OOH (P)  |             |             |             |                                                          |
|-----------------------|-------------|-------------|-------------|----------------------------------------------------------|
| Cartesian Coordinates |             |             |             | Frequency and Energy                                     |
| C                     | 2.54709700  | 1.13392800  | -0.64047900 | Thermal Correction to Energy = 0.278328 Hartree          |
| C                     | 1.69089800  | 1.98681100  | 0.03028100  | Thermal Correction to Enthalpy = 0.279273 Hartree        |
| C                     | 0.46857600  | 1.51813100  | 0.53376200  | Thermal Correction to Free Energy = 0.217974 Hartree     |
| C                     | 0.08045700  | 0.18514600  | 0.36212500  | Hartree                                                  |
| C                     | 0.92430500  | -0.67360700 | -0.32646500 | EE + Zero-point Energy = -729.80574 Hartree              |
| C                     | 2.16412600  | -0.20717200 | -0.83510100 | EE + Thermal Energy Correction = -729.79002 Hartree      |
| O                     | 2.95272600  | -1.02430900 | -1.49890300 | Hartree                                                  |
| O                     | 2.08185200  | 3.27546000  | 0.18994200  | EE + Thermal Enthalpy Correction = -729.78908 Hartree    |
| C                     | -1.26437400 | -0.27485000 | 0.86276700  | Hartree                                                  |
| C                     | -2.38069500 | 0.02219000  | -0.14660000 | EE + Thermal Free Energy Correction = -729.85038 Hartree |
| C                     | -3.75510200 | -0.40321700 | 0.36158100  | Hartree                                                  |
| C                     | -4.87220300 | -0.13194500 | -0.64356300 |                                                          |
| C                     | -6.24351800 | -0.54644200 | -0.11849400 |                                                          |
| H                     | 3.50003400  | 1.48263700  | -1.01880700 |                                                          |
| H                     | -0.18611200 | 2.20153000  | 1.06964500  |                                                          |
| H                     | 0.65029300  | -1.70991900 | -0.50164400 |                                                          |
| H                     | 1.41254700  | 3.76695500  | 0.68002300  |                                                          |
| H                     | -1.23345800 | -1.35010800 | 1.06111200  |                                                          |
| H                     | -1.49167300 | 0.22535900  | 1.80935900  |                                                          |
| H                     | -2.38671500 | 1.09529000  | -0.37053300 |                                                          |
| H                     | -2.15701100 | -0.49279500 | -1.08785300 |                                                          |
| H                     | -3.73895800 | -1.47309500 | 0.60343300  |                                                          |
| H                     | -3.97512100 | 0.12386500  | 1.29824600  |                                                          |
| H                     | -4.88026100 | 0.93474700  | -0.89374600 |                                                          |
| H                     | -4.65566200 | -0.66798000 | -1.57408800 |                                                          |
| H                     | -7.02870500 | -0.35788500 | -0.85450100 |                                                          |
| H                     | -6.26214200 | -1.61286400 | 0.12435400  |                                                          |
| H                     | -6.49739800 | 0.00627200  | 0.79062800  |                                                          |
| H                     | 3.39724000  | -1.77300200 | -0.76933300 |                                                          |
| O                     | 3.76692100  | -2.38966600 | 0.23511500  |                                                          |
| O                     | 3.31643900  | -1.62202200 | 1.26411100  |                                                          |
| H                     | 2.43219900  | -1.96855800 | 1.47270200  |                                                          |
| Oli-1O...H...OOH (W)  |             |             |             |                                                          |
| Cartesian Coordinates |             |             |             | Frequency and Energy                                     |
| C                     | 3.03406600  | -0.52413200 | -0.13745000 | Zero-point Energy Correction = 0.262672 Hartree          |
| C                     | 2.35968900  | -1.69863600 | -0.39657400 | Thermal Correction to Energy = 0.278955 Hartree          |
| C                     | 1.02052300  | -1.87004500 | 0.00476800  | Thermal Correction to Enthalpy = 0.279899 Hartree        |
| C                     | 0.34781900  | -0.86525900 | 0.69494500  | Thermal Correction to Free Energy = 0.217466 Hartree     |
| C                     | 1.02639800  | 0.31359900  | 0.98983300  | Hartree                                                  |
| C                     | 2.36721900  | 0.49298600  | 0.57055000  | EE + Zero-point Energy = -729.80726 Hartree              |
| O                     | 2.99838700  | 1.62426600  | 0.85115800  | EE + Thermal Energy Correction = -729.79097 Hartree      |
| O                     | 3.02306200  | -2.68450800 | -1.06317100 | Hartree                                                  |
| C                     | -1.10740100 | -1.00872000 | 1.05097300  | EE + Thermal Enthalpy Correction = -729.79003 Hartree    |
| C                     | -1.99833400 | -0.29356200 | 0.02790900  | Hartree                                                  |
| C                     | -3.48011200 | -0.40000500 | 0.37229500  | EE + Thermal Free Energy Correction = -729.85246 Hartree |



|                       |             |             |             |                                                   |
|-----------------------|-------------|-------------|-------------|---------------------------------------------------|
| C                     | -4.37888200 | 0.30566400  | -0.63952500 | Hartree                                           |
| C                     | -5.85742600 | 0.19307900  | -0.28056500 |                                                   |
| H                     | 4.05910200  | -0.38275500 | -0.45681900 |                                                   |
| H                     | 0.51599900  | -2.80199500 | -0.23388400 |                                                   |
| H                     | 0.54199600  | 1.11576600  | 1.53883600  |                                                   |
| H                     | 2.44367700  | -3.44762000 | -1.18471700 |                                                   |
| H                     | -1.37482500 | -2.06800500 | 1.09250500  |                                                   |
| H                     | -1.28313600 | -0.58073600 | 2.04244800  |                                                   |
| H                     | -1.70519700 | 0.76267600  | -0.02471100 |                                                   |
| H                     | -1.81714900 | -0.72182500 | -0.96484400 |                                                   |
| H                     | -3.76312400 | -1.45805700 | 0.43153000  |                                                   |
| H                     | -3.65115200 | 0.02621900  | 1.36832100  |                                                   |
| H                     | -4.09239600 | 1.36135400  | -0.69940000 |                                                   |
| H                     | -4.20670100 | -0.12236600 | -1.63310600 |                                                   |
| H                     | -6.48859900 | 0.70362300  | -1.01147500 |                                                   |
| H                     | -6.16902100 | -0.85461700 | -0.24170300 |                                                   |
| H                     | -6.05326600 | 0.63578700  | 0.70018300  |                                                   |
| H                     | 2.47080100  | 2.46353800  | 0.33644100  |                                                   |
| O                     | 1.79026500  | 3.18524500  | -0.45699400 |                                                   |
| O                     | 0.98775700  | 2.28385600  | -1.08726500 |                                                   |
| H                     | 0.17585600  | 2.22833000  | -0.55238000 |                                                   |
| OliA-7C...H...OH (P)  |             |             |             |                                                   |
| Cartesian Coordinates |             |             |             | Frequency and Energy                              |
| C                     | -2.96788800 | 1.55646500  | -0.01610900 | Zero-point Energy Correction = 0.274307 Hartree   |
| C                     | -1.80890900 | 2.28241800  | 0.17399700  | Thermal Correction to Energy = 0.292435 Hartree   |
| C                     | -0.55535000 | 1.65720500  | 0.15703200  | Thermal Correction to Enthalpy = 0.293379 Hartree |
| C                     | -0.44093100 | 0.28912100  | -0.02381500 | Thermal Correction to Free Energy = 0.226322      |
| C                     | -1.62706300 | -0.48512300 | -0.18671900 | Hartree                                           |
| C                     | -2.88203400 | 0.18155100  | -0.21221900 | EE + Zero-point Energy = -843.22436 Hartree       |
| O                     | -4.04298900 | -0.45420100 | -0.40595300 | EE + Thermal Energy Correction = -843.20623       |
| O                     | -1.93018200 | 3.61362000  | 0.35682500  | Hartree                                           |
| C                     | 0.93794500  | -0.31306200 | -0.07409800 | EE + Thermal Enthalpy Correction = -843.20529     |
| C                     | 2.12304300  | 0.63607400  | -0.17290500 | Hartree                                           |
| C                     | 3.43614900  | -0.13223900 | -0.30542000 | EE + Thermal Free Energy Correction = -843.27234  |
| C                     | 4.65735900  | 0.78246900  | -0.35250500 | Hartree                                           |
| C                     | 5.96005500  | 0.00395400  | -0.50882900 |                                                   |
| C                     | -1.66776200 | -1.94530000 | -0.30642500 |                                                   |
| O                     | -2.65068900 | -2.58034900 | -0.65878800 |                                                   |
| O                     | -0.55203600 | -2.60850900 | 0.03556400  |                                                   |
| H                     | -3.93583300 | 2.04049300  | -0.02517900 |                                                   |
| H                     | 0.32986400  | 2.26968500  | 0.27489700  |                                                   |
| H                     | -3.85027400 | -1.39621200 | -0.58775400 |                                                   |
| H                     | -1.06035100 | 4.01119500  | 0.48532500  |                                                   |
| H                     | 1.00080900  | -1.07871500 | -0.84853400 |                                                   |
| H                     | 1.99534400  | 1.29510500  | -1.04081200 |                                                   |
| H                     | 2.17005700  | 1.27746800  | 0.71339800  |                                                   |
| H                     | 3.53380700  | -0.82708200 | 0.53707800  |                                                   |

|                       |             |             |             |                                                   |
|-----------------------|-------------|-------------|-------------|---------------------------------------------------|
| H                     | 3.40729000  | -0.74512500 | -1.21440300 |                                                   |
| H                     | 4.54842100  | 1.48945500  | -1.18267900 |                                                   |
| H                     | 4.69286600  | 1.38098600  | 0.56438500  |                                                   |
| H                     | 6.82578800  | 0.66994300  | -0.53388400 |                                                   |
| H                     | 6.09875600  | -0.69445700 | 0.32139100  |                                                   |
| H                     | 5.95819200  | -0.57782500 | -1.43510500 |                                                   |
| H                     | -0.72204500 | -3.55105600 | -0.12511700 |                                                   |
| H                     | 1.09310000  | -0.89149800 | 0.90561000  |                                                   |
| O                     | 1.22171800  | -1.65132200 | 2.20186000  |                                                   |
| H                     | 0.55994900  | -2.30746200 | 1.92340400  |                                                   |
| OliA-7C...H...OH (W)  |             |             |             |                                                   |
| Cartesian Coordinates |             |             |             | Frequency and Energy                              |
| C                     | -3.20448200 | 0.77251400  | -0.56966100 | Zero-point Energy Correction = 0.259457 Hartree   |
| C                     | -2.32183100 | 1.83347500  | -0.46236700 | Thermal Correction to Energy = 0.277374 Hartree   |
| C                     | -1.00824700 | 1.62834200  | -0.04561900 | Thermal Correction to Enthalpy = 0.278319 Hartree |
| C                     | -0.55356900 | 0.34782000  | 0.26049500  | Thermal Correction to Free Energy = 0.211098      |
| C                     | -1.42287300 | -0.75951800 | 0.14031100  | Hartree                                           |
| C                     | -2.75961500 | -0.51024600 | -0.26177700 | EE + Zero-point Energy = -842.79174 Hartree       |
| O                     | -3.65811800 | -1.51538100 | -0.36319100 | EE + Thermal Energy Correction = -842.77383       |
| O                     | -2.79340200 | 3.07975800  | -0.76590900 | Hartree                                           |
| C                     | 0.88306700  | 0.22934400  | 0.69524000  | EE + Thermal Enthalpy Correction = -842.77288     |
| C                     | 1.87241000  | 0.09803200  | -0.45800600 | Hartree                                           |
| C                     | 3.30948700  | -0.05403500 | 0.02797200  | EE + Thermal Free Energy Correction = -842.8401   |
| C                     | 4.31299800  | -0.18181600 | -1.11469000 | Hartree                                           |
| C                     | 5.74551300  | -0.33896000 | -0.61404900 |                                                   |
| C                     | -0.99512300 | -2.18686000 | 0.38245500  |                                                   |
| O                     | -1.93130900 | -3.06204700 | 0.42454800  |                                                   |
| O                     | 0.20838800  | -2.47679000 | 0.50957300  |                                                   |
| H                     | -4.23077100 | 0.93013900  | -0.87813400 |                                                   |
| H                     | -0.34012900 | 2.47848400  | 0.05027300  |                                                   |
| H                     | -3.14168800 | -2.33514700 | -0.04745500 |                                                   |
| H                     | -2.10106900 | 3.73611800  | -0.61574400 |                                                   |
| H                     | 1.02936200  | -0.55369600 | 1.43593500  |                                                   |
| H                     | 1.59064300  | -0.77279300 | -1.06165500 |                                                   |
| H                     | 1.78585200  | 0.97671100  | -1.10781700 |                                                   |
| H                     | 3.57499100  | 0.80909500  | 0.65067000  |                                                   |
| H                     | 3.37737800  | -0.93919500 | 0.67220600  |                                                   |
| H                     | 4.04152900  | -1.04275600 | -1.73515500 |                                                   |
| H                     | 4.24179800  | 0.70226300  | -1.75773100 |                                                   |
| H                     | 6.45305300  | -0.43022000 | -1.44130400 |                                                   |
| H                     | 6.04263600  | 0.52403500  | -0.01143800 |                                                   |
| H                     | 5.84224900  | -1.23131000 | 0.01085300  |                                                   |
| H                     | 1.16596700  | 1.20017500  | 1.23309400  |                                                   |
| O                     | 1.53749200  | 2.47836300  | 2.00117300  |                                                   |
| H                     | 0.61737100  | 2.64833800  | 2.27202100  |                                                   |
| OliA-7C...H...OOH (P) |             |             |             |                                                   |
| Cartesian Coordinates |             |             |             | Frequency and Energy                              |

|                       |             |             |             |                                                   |
|-----------------------|-------------|-------------|-------------|---------------------------------------------------|
| C                     | -2.96026600 | 1.60347500  | -0.11213400 | Zero-point Energy Correction = 0.278523 Hartree   |
| C                     | -1.81431800 | 2.31535000  | 0.19388500  | Thermal Correction to Energy = 0.297581 Hartree   |
| C                     | -0.55618200 | 1.70647400  | 0.15858700  | Thermal Correction to Enthalpy = 0.298525 Hartree |
| C                     | -0.42290000 | 0.35650000  | -0.14841800 | Thermal Correction to Free Energy = 0.229232      |
| C                     | -1.60191700 | -0.40657700 | -0.40508400 | Hartree                                           |
| C                     | -2.85609200 | 0.25251700  | -0.43000800 | EE + Zero-point Energy = -918.36697 Hartree       |
| O                     | -4.00251200 | -0.37171900 | -0.73026900 | EE + Thermal Energy Correction = -918.34791       |
| O                     | -1.95897000 | 3.62274100  | 0.49559500  | Hartree                                           |
| C                     | 0.93723000  | -0.21425100 | -0.25167100 | EE + Thermal Enthalpy Correction = -918.34697     |
| C                     | 2.13544000  | 0.71043700  | -0.30799500 | Hartree                                           |
| C                     | 3.43756700  | -0.06988300 | -0.47837500 | EE + Thermal Free Energy Correction = -918.41626  |
| C                     | 4.66954900  | 0.83091800  | -0.49898100 | Hartree                                           |
| C                     | 5.96121400  | 0.04273400  | -0.69284000 |                                                   |
| C                     | -1.62762500 | -1.86008900 | -0.59569900 |                                                   |
| O                     | -2.54828400 | -2.47270400 | -1.11186800 |                                                   |
| O                     | -0.57778600 | -2.53034500 | -0.09566000 |                                                   |
| H                     | -3.93048000 | 2.08320400  | -0.11565900 |                                                   |
| H                     | 0.32160000  | 2.31172300  | 0.35019000  |                                                   |
| H                     | -3.79512500 | -1.28383600 | -1.00979900 |                                                   |
| H                     | -1.10079200 | 4.01135500  | 0.70384300  |                                                   |
| H                     | 1.00977100  | -1.03852100 | -0.95959100 |                                                   |
| H                     | 2.01744600  | 1.41340900  | -1.14398600 |                                                   |
| H                     | 2.19403500  | 1.31327300  | 0.60455300  |                                                   |
| H                     | 3.53558100  | -0.79769000 | 0.33614800  |                                                   |
| H                     | 3.39370400  | -0.64731400 | -1.40948400 |                                                   |
| H                     | 4.56298100  | 1.56924600  | -1.30163400 |                                                   |
| H                     | 4.71815400  | 1.39427900  | 0.43927000  |                                                   |
| H                     | 6.83477600  | 0.69877500  | -0.69957600 |                                                   |
| H                     | 6.09676000  | -0.68711200 | 0.11046100  |                                                   |
| H                     | 5.94611700  | -0.50462600 | -1.63968900 |                                                   |
| H                     | -0.70001800 | -3.46948500 | -0.30958300 |                                                   |
| H                     | 1.10243500  | -0.84526300 | 0.85262900  |                                                   |
| O                     | 1.20753300  | -1.35620800 | 1.98857200  |                                                   |
| O                     | -0.05867800 | -1.27610200 | 2.51145200  |                                                   |
| H                     | -0.50758300 | -2.05236100 | 2.14173900  |                                                   |
| OliA-7C...H...OOH (W) |             |             |             |                                                   |
| Cartesian Coordinates |             |             |             | Frequency and Energy                              |
| C                     | -2.95801800 | 1.60043600  | -0.09402800 | Zero-point Energy Correction = 0.263842 Hartree   |
| C                     | -1.82085500 | 2.33550100  | 0.20472600  | Thermal Correction to Energy = 0.282625 Hartree   |
| C                     | -0.55991300 | 1.74707300  | 0.18195200  | Thermal Correction to Enthalpy = 0.283569 Hartree |
| C                     | -0.41907100 | 0.38530300  | -0.10580300 | Thermal Correction to Free Energy = 0.21504       |
| C                     | -1.57479200 | -0.39444200 | -0.35965700 | Hartree                                           |
| C                     | -2.82457900 | 0.24994500  | -0.40021000 | EE + Zero-point Energy = -917.939 Hartree         |
| O                     | -3.96470600 | -0.41999700 | -0.72187800 | EE + Thermal Energy Correction = -917.92021       |
| O                     | -1.99167600 | 3.66167100  | 0.48790900  | Hartree                                           |
| C                     | 0.94054000  | -0.19277200 | -0.19451800 | EE + Thermal Enthalpy Correction = -917.91927     |
| C                     | 2.13776300  | 0.72412000  | -0.33294000 | Hartree                                           |

|   |             |             |             |                                                 |
|---|-------------|-------------|-------------|-------------------------------------------------|
| C | 3.44207700  | -0.06373100 | -0.42960700 | EE + Thermal Free Energy Correction = -917.9878 |
| C | 4.66948400  | 0.83765600  | -0.52317200 | Hartree                                         |
| C | 5.96652000  | 0.04209600  | -0.63093300 |                                                 |
| C | -1.55177800 | -1.89354900 | -0.54779800 |                                                 |
| O | -2.39229900 | -2.38207500 | -1.35449900 |                                                 |
| O | -0.75272900 | -2.58281600 | 0.13633100  |                                                 |
| H | -3.93474700 | 2.06827800  | -0.11006700 |                                                 |
| H | 0.30784400  | 2.36904500  | 0.36587800  |                                                 |
| H | -3.68113300 | -1.29347600 | -1.07638200 |                                                 |
| H | -1.13613200 | 4.07236600  | 0.66733700  |                                                 |
| H | 0.98914100  | -1.05722000 | -0.85867800 |                                                 |
| H | 2.01629100  | 1.34703400  | -1.22966400 |                                                 |
| H | 2.19484900  | 1.40911600  | 0.51919400  |                                                 |
| H | 3.53584000  | -0.71486800 | 0.44830300  |                                                 |
| H | 3.40489500  | -0.72185400 | -1.30548200 |                                                 |
| H | 4.56699900  | 1.49687400  | -1.39218000 |                                                 |
| H | 4.70492600  | 1.48622400  | 0.35879000  |                                                 |
| H | 6.83727400  | 0.69925900  | -0.68777500 |                                                 |
| H | 6.09476800  | -0.61088600 | 0.23702700  |                                                 |
| H | 5.96232100  | -0.58864400 | -1.52436300 |                                                 |
| H | 1.12703800  | -0.76807300 | 0.91361700  |                                                 |
| O | 1.18021100  | -1.38331500 | 2.03849200  |                                                 |
| O | -0.14024700 | -1.43495500 | 2.42920200  |                                                 |
| H | -0.54050200 | -2.00023700 | 1.71838600  |                                                 |
